# Supplementary material
Source: publisher site journal article supplement (https://www.dovepress.com/article/507576)
Supplement: Supplementary file 1 [file 507576-Supplementary-Material.docx]

Supporting Online Information and Supplemental Figures

Dynamic Nanoscale Peptide Assemblies and Formulations for Temporally Controlled Ototopical Drug Delivery

Evan A. Patel,a Swapnil V. Shah,a†, Trevor A. Poulson,a H. Christopher Fry,b and Ashok A. Jagasiaa*

a Rush University Medical Center, Chicago, IL 60612.

b Center for Nanoscale Material, Argonne National Laboratory, Lemont, IL 60439.


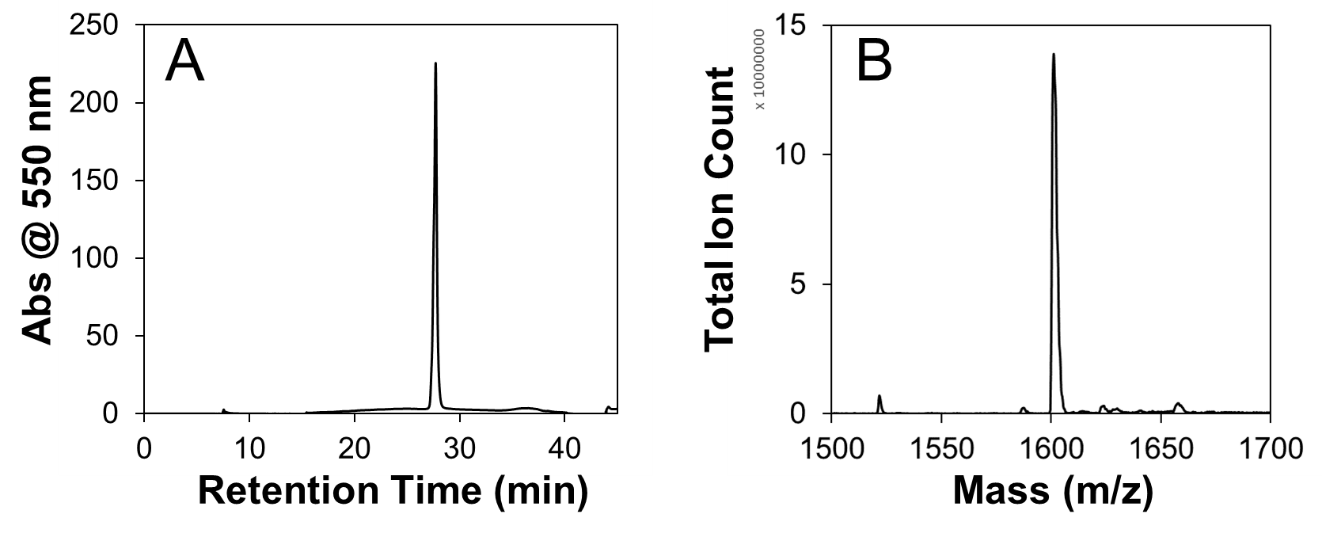


Supplemental Figure S1.A) HPLC ( > 99% pure) and S1B) ESI-Mass spectrometry characterization (Calculated for C86H133N15O14, 1600.02 (Monoisotopic mass); Found, 1601.1 (M+H+) of PA-TAMRA.


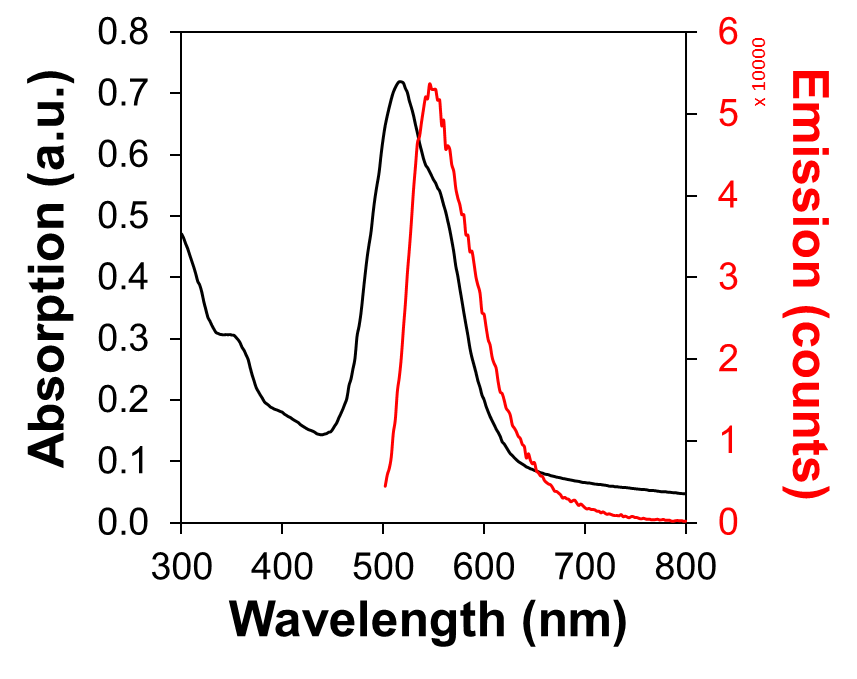


Supplemental Figure S2. UV/Visible (Black) and fluorescence spectroscopy (Red) of PA-TAMRA. labs = 510 nm, lem = 550 nm.


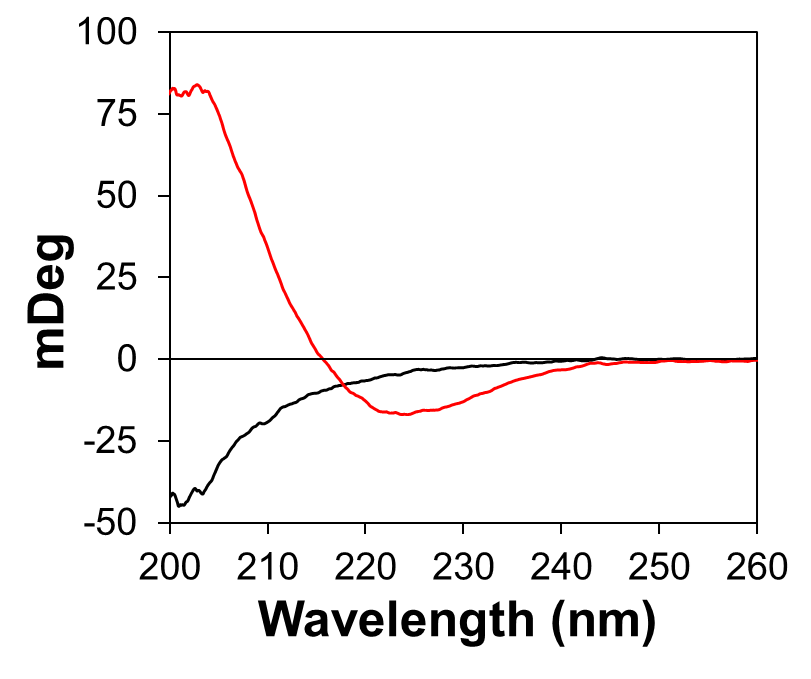


Supplemental Figure S3. Circular dichroism of 10:1 PA:PA-TAMRA (500 mM:50 uM) in PBS, pH 7.4 (Black) and PBS, pH 11 (Red). At pH 7, the CD spectrum demonstrates a random coil conformation. At pH 11, the CD spectrum demonstrates b-sheet formation with min at 223 nm.


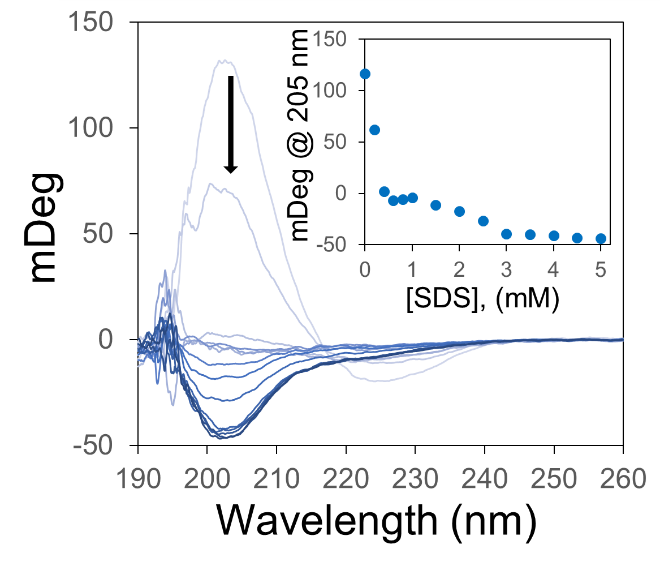


Supplemental Figure S4. Circular dichroism spectra of PA (500 μM) in PBS, pH 7.4 with increasing concentrations of SDS from 0 mM (light blue) to 5 mM (dark blue) as indicated by the black arrow. Inset: The CD signal at 205 nm as a function of increasing SDS concentration indicating a loss of -sheet character transitioning to random coil.


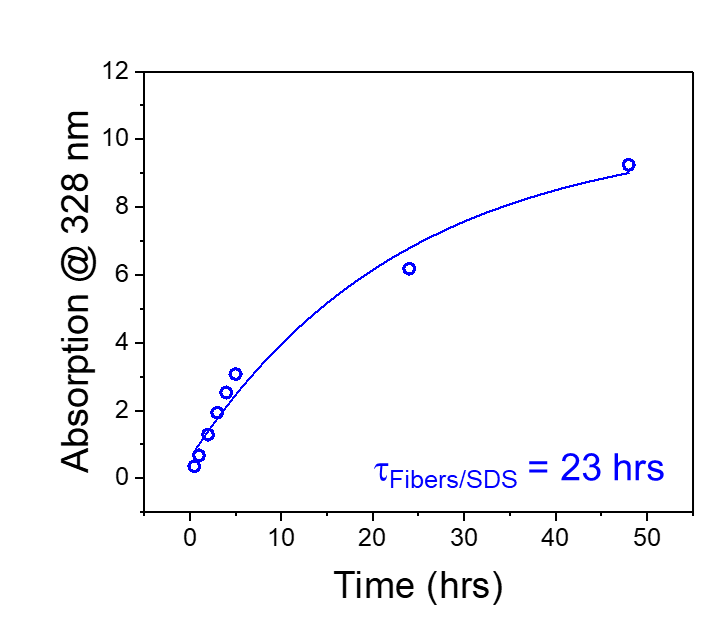


Supplemental Figure S5. Ciprofloxacin release from PA-fibers mixed with 1 wt% SDS over a 48 hr period.
